# Supplementary material
Source: publisher figshare collection journal article supplement (https://acs.figshare.com/ndownloader/files/13500395)
Supplement: Supplementary file 1 [file 13500395]

## Supporting Information

### Cancer Theranostic Applications of Albumin-coated Tobacco mosaic virus Nanoparticles

A. S. Pitek,<sup>a</sup> H. Hu,<sup>a,b</sup> S. Shukla,<sup>a,b</sup> N.F. Steinmetz<sup>a,b\*</sup>

<sup>a</sup>Department of Biomedical Engineering, Case Western Reserve University, Cleveland, OH 44106; <sup>b</sup>Department of NanoEngineering, Moores Cancer Center, University of California-San Diego, La Jolla, CA 92093

[nsteinmetz@ucsd.edu](mailto:nsteinmetz@ucsd.edu)

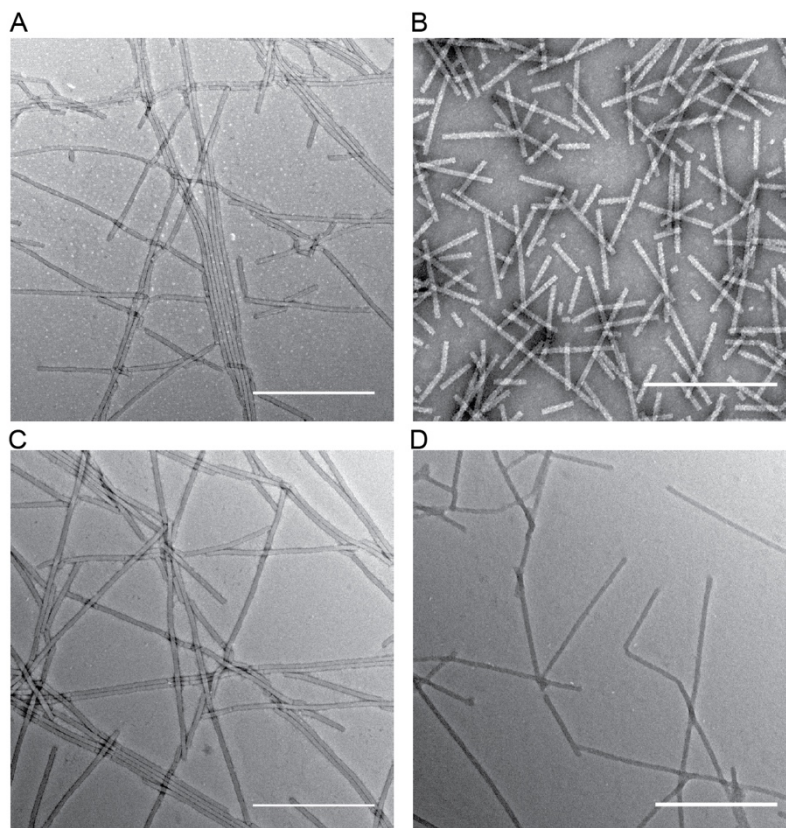

**Figure S1.** TEM images of: A, TMV-Cy5; B, SA-TMV-Cy5; C, TMV-/-DOX; D, SA-TMV-/-DOX. Scale bars represent 500 nm.

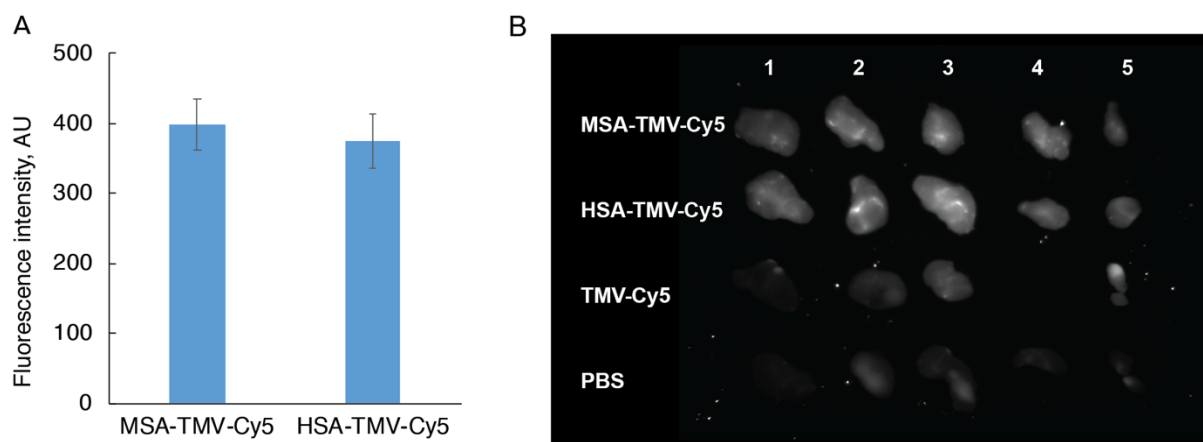

**Figure S2. In vitro cell uptake and in vivo biodistribution of MSA-TMV-Cy5 and HSA-TMV-Cy5 VNP in MDA-MB231 cancer cells.** A, Quantification of cellular uptake of MSA-TMV-Cy5 and HSA-TMV-Cy5 in vitro using MDA-MB231 cells. No significant differences in uptake were found. B, Representative Maestro fluorescence image of accumulation of MSA-TMV-Cy5 and HSA-TMV-Cy5 particles in a heterotopic model of human MDA-MB231 in NCR nu/nu mice. No substantial differences in tumor targeting were found.

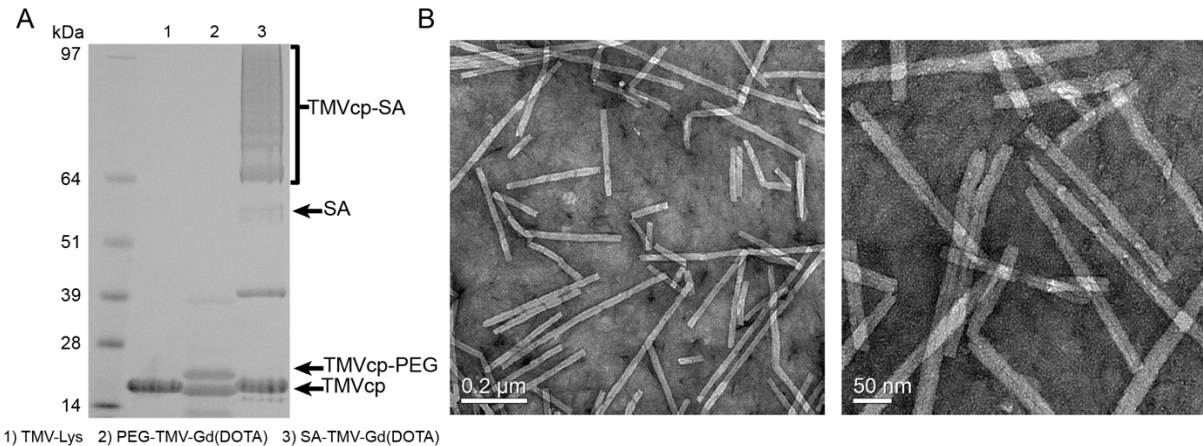

**Figure S3. Characterization of TMV-Gd(DOTA).** A, SDS-PAGE analysis of PEG-TMV-Gd(DOTA) and SA-TMV-Gd(DOTA) particles. B, TEM images of SA-TMV-Gd(DOTA) demonstrate structural integrity of TMV particles after the conjugation.

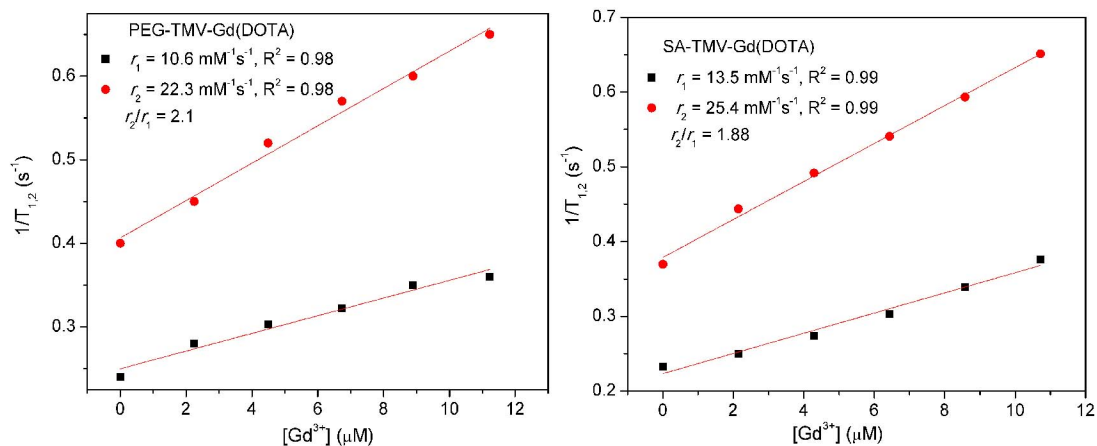

**Figure S4. Characterization of MR properties of SA-TMV-Gd(DOTA).** The water proton longitudinal ( $r_1$ ) and transversal ( $r_2$ ) relaxation rates of PEG-TMV-Gd(DOTA) and SA-TMV-Gd(DOTA) as a function of  $\text{Gd}^{3+}$  concentration measured at 60 MHz and 37°C.
